# Supplementary material for: Enzalutamide-induced signatures revealed by epigenetic plasticity using single-cell multi-omics sequencing in prostate cancer
Source: PubMed Central journal article supplement — Mol Ther Nucleic Acids. 2023 Feb 18;31:648–61. doi: 10.1016/j.omtn.2023.02.022 (PMC9995291; doi:10.1016/j.omtn.2023.02.022), 2023-02-18
Supplement: mmc1.pdf [file mmc1.pdf]

**OMTN, Volume 31**

**Supplemental information**

**Enzalutamide-induced signatures revealed  
by epigenetic plasticity using single-cell  
multi-omics sequencing in prostate cancer**

**Huihui Fan, Jinze Li, Astrid M. Manuel, and Zhongming Zhao**

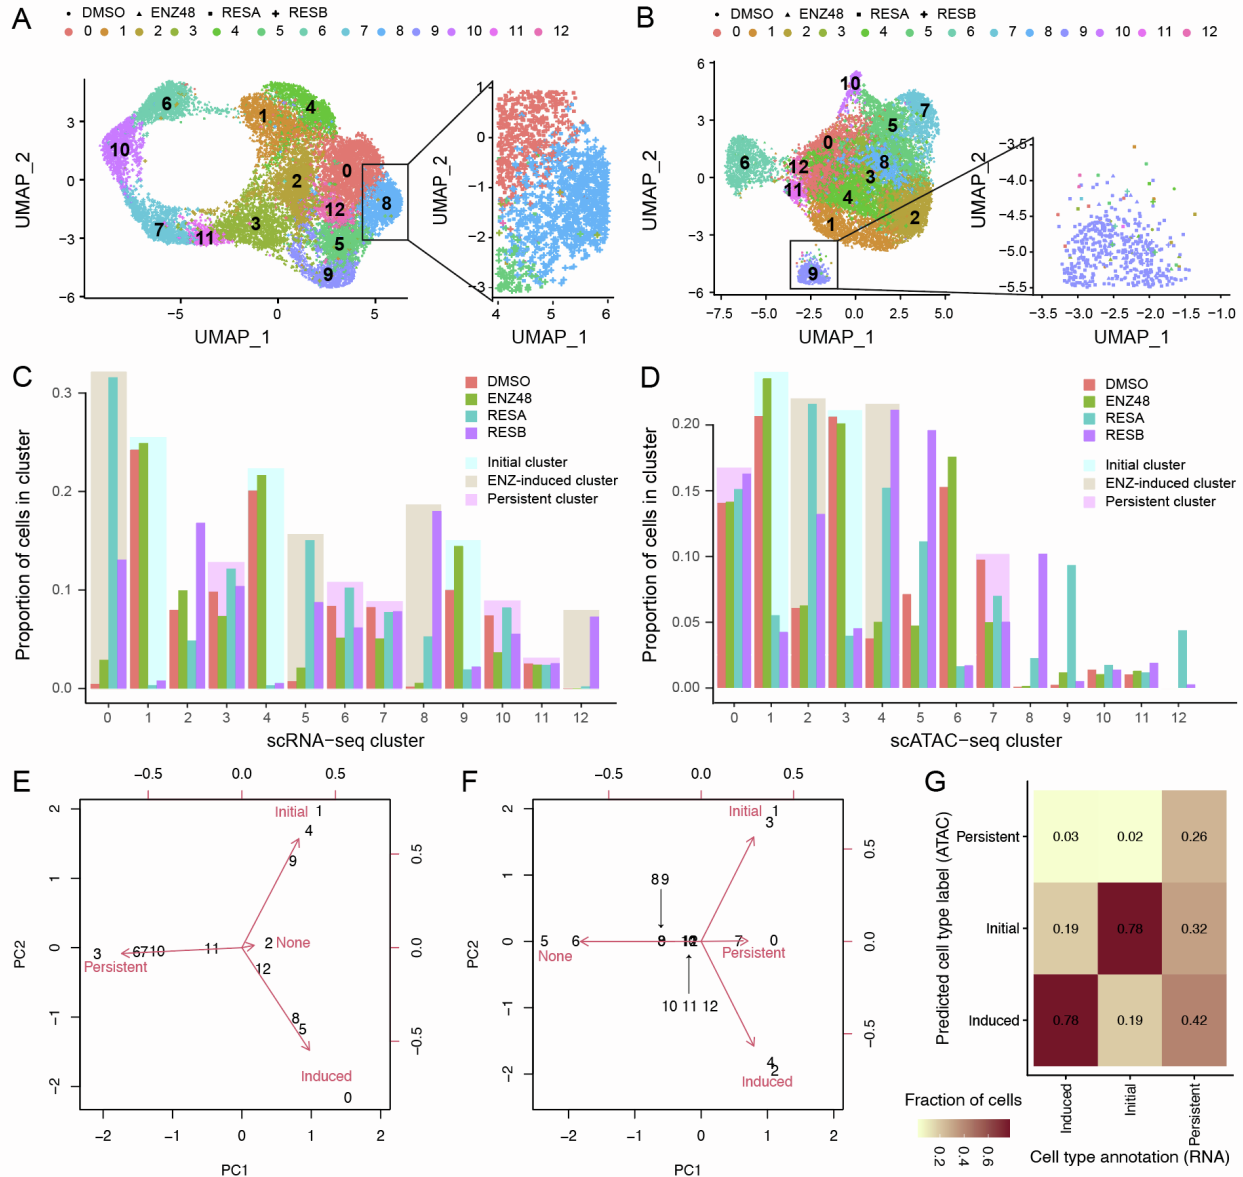

**Figure S1.** UMAP (Integrated uniform manifold approximation and projection) plots for scRNA-seq (A) and scATAC-seq (B) of DMSO, LNCaP-ENZ48, RES-A, and RES-B cell lines. Each dot represents a cell and colored by cluster identity. Zoom-in section shows the shapes of each dot which represents four different cell lines. Barplot showing cellular compositions of cell lines in scRNA-seq (C) and scATAC-seq (D) clusters. These clusters are further colored according to their cellular phenotypes: initial, ENZ-induced, and pre-existing ENZ-resistant. Principal component analysis (PCA) using pseudo-bulk read count tables per cluster was shown for both scRNA-seq (E) and scATAC-seq (F) data. Three cellular phenotypes are labeled in red. (G) Fraction of consistent cells being assigned to the same phenotype using label transfer technique. scRNA-seq is used as the reference, as shown on the x-axis.

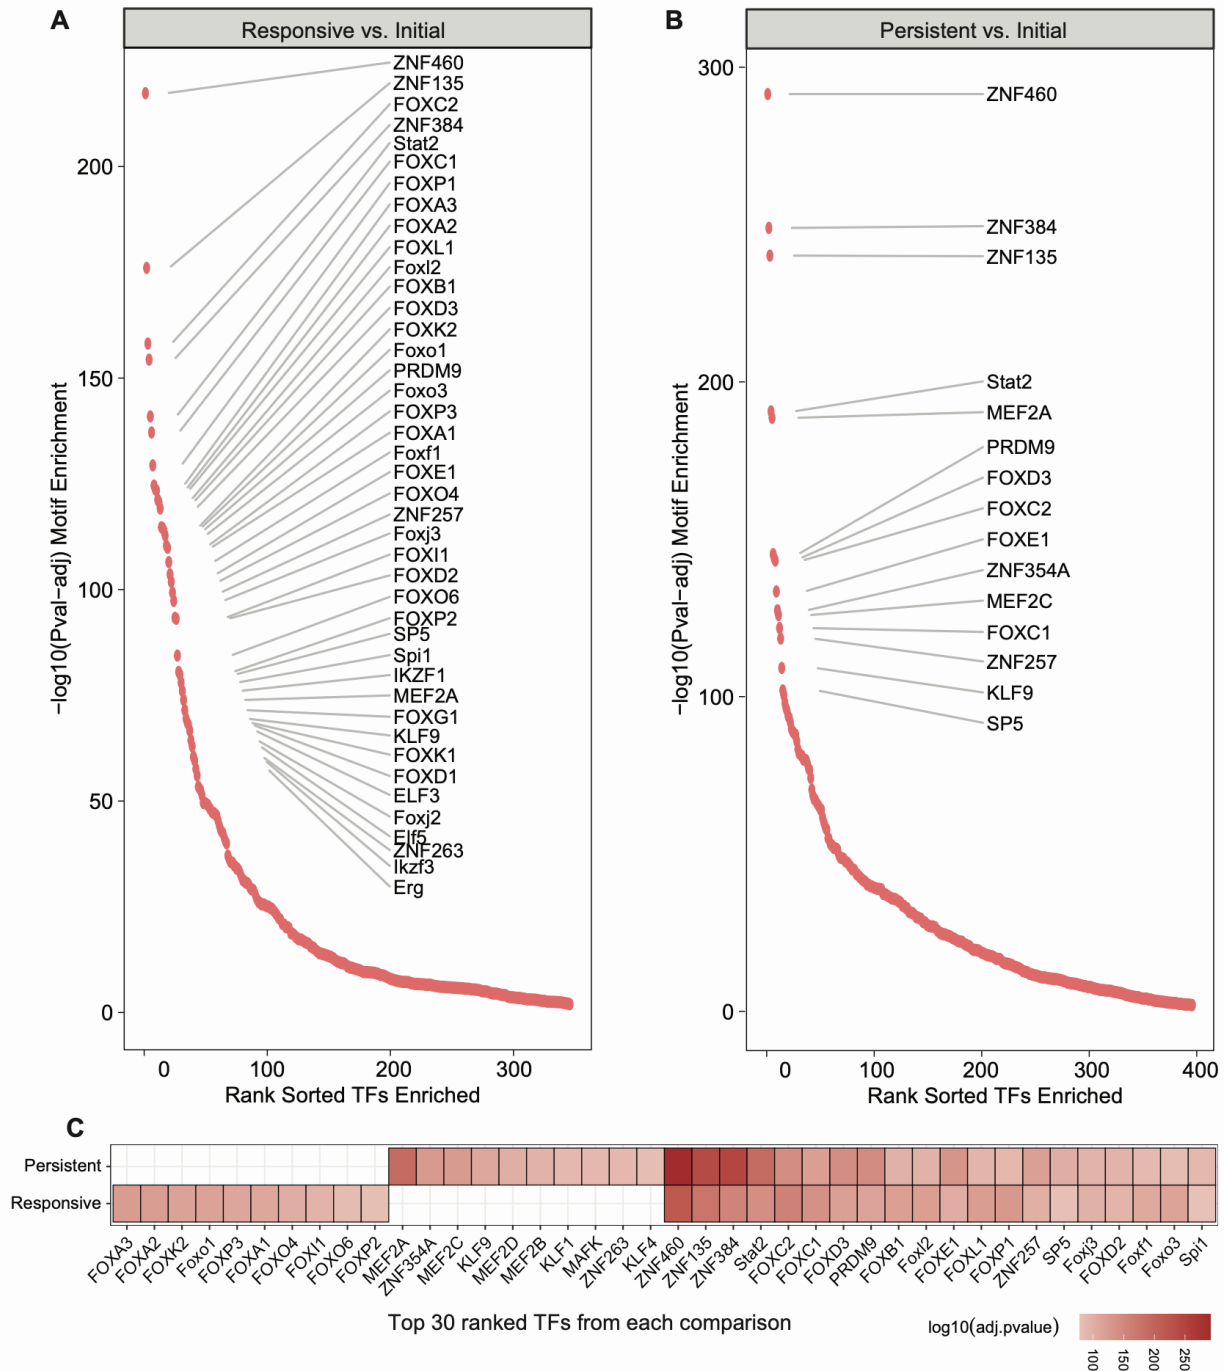

**Figure S2.** Transcriptional regulatory landscape in both comparisons. Transcription factor (TF) enrichment analysis using differentially accessible regions in comparison between early responsive and initial phenotype (A), and that between persistent and initial phenotype (B). Highly ranked TFs are labeled on the right side of the plot. Heatmap showing the top 30 enriched TFs per comparison. Each column is a TF, while each row is a comparison. Enrichment significant level is used as the gradient color.

**Table S1.** Quality control thresholds and metrics for the scRNA-seq and scATAC-seq samples.

| QC thresholds for scRNA-seq  |                                    |                                    |                                                           |                                                      |                             |                              |                              |
|------------------------------|------------------------------------|------------------------------------|-----------------------------------------------------------|------------------------------------------------------|-----------------------------|------------------------------|------------------------------|
| Sample                       | Number of detected genes           | Total number of molecules detected | Percentage of reads arising from the mitochondrial genome | Number of cells prior to QC                          | Number of cells after QC    | Number of cells filtered out |                              |
| LNCaP                        | > 3000 and < 7000                  | > 16000 and < 50000                | < 15                                                      | 2358                                                 | 1782                        | 576                          |                              |
| LNCaP-ENZ48                  | > 1500 and < 5000                  | > 5000 and < 25000                 | < 15                                                      | 4812                                                 | 4315                        | 497                          |                              |
| RES-A                        | > 1500 and < 5000                  | > 5000 and < 25000                 | < 17                                                      | 5156                                                 | 4569                        | 587                          |                              |
| RES-B                        | > 1500 and < 5000                  | > 5000 and < 25000                 | < 20                                                      | 4907                                                 | 4061                        | 846                          |                              |
| QC thresholds for scATAC-seq |                                    |                                    |                                                           |                                                      |                             |                              |                              |
| Sample                       | Total number of fragments in peaks | Fraction of fragments in peaks     | Strength of nucleosome binding pattern                    | Transcription start site enrichment score as defined | Number of cells prior to QC | Number of cells after QC     | Number of cells filtered out |
| LNCaP                        | > 2000 and < 20000                 | > 30                               | < 9                                                       | > 2                                                  | 4436                        | 3284                         | 1152                         |
| LNCaP-ENZ48                  | > 1000 and < 20000                 | > 30                               | < 9                                                       | > 2                                                  | 3376                        | 3115                         | 261                          |
| RES-A                        | > 2000 and < 20000                 | > 40                               | < 8                                                       | > 2                                                  | 4407                        | 3823                         | 584                          |
| RES-B                        | > 2000 and < 25000                 | > 30                               | < 8                                                       | > 2                                                  | 4747                        | 3227                         | 1520                         |

**Table S2.** Differentially expressed genes identified from both comparisons.

**Table S3.** Differentially accessible regions identified from both comparisons.

**Table S4.** Signature gene sets with bi-directional epigenetic regulations.

**Table S5.** Gene set enrichment analysis using signature gene sets.

**Table S6.** Gene set enrichment analysis showing only Gene Ontology and KEGG pathway terms.

**Table S7.** Survival analysis showing all the genes both significant and not significant.
